# Supplementary material for: Pharmacokinetics and Pharmacodynamics of the Reverse Transcriptase Inhibitor Tenofovir and Prophylactic Efficacy against HIV-1 Infection
Source: PubMed Central journal article supplement (PMC3394807; doi:10.1371/journal.pone.0040382), 2012-07-11
Supplement: pone.0040382.s002.pdf [file pone.0040382.s002.pdf]

**Table S2. Predicted individual TFV-DP elimination kinetics.**

| Pat.#                       | $C_0(i)$ (fMol/ $10^6$ cells) | $k_{\text{out}}(i)$ ( $\text{h}^{-1}$ ) | $t_{1/2}^b$ (h)    |
|-----------------------------|-------------------------------|-----------------------------------------|--------------------|
| 1                           | 80.02                         | 0.0054                                  | 129.2              |
| 2                           | 91.21                         | 0.0018                                  | 386.2              |
| 3                           | 241                           | 0.026                                   | 26.7               |
| 4                           | 144.1                         | 0.0023                                  | 296.9              |
| 5                           | 61.33                         | 0.0035                                  | 196.5              |
| 6                           | 111.5                         | 0.0064                                  | 109.1              |
| 7                           | 338.6                         | 0.023                                   | 29.7               |
| 8                           | 75.61                         | 0.0068                                  | 101.4              |
| mean ( $\pm$ std)           | 143 ( $\pm$ 98)               | 0.0094 ( $\pm$ 0.0096)                  | 159.4 ( $\pm$ 127) |
| weighted mean ( $\pm$ std)* | 156 ( $\pm$ 166)              | 0.012 ( $\pm$ 0.01)                     | 125.5 ( $\pm$ 134) |
| median (range)              | 101 (61;339)                  | 0.0059 (0.002;0.026)                    | 119.1 (26.7;386.2) |

Estimated individual plateau concentrations  $C_0(i)$  and elimination rates  $k_{\text{out}}(i)$  of TFV-DP from PBMCs (after treatment cessation). Parameters were estimated assuming first-order decay kinetics according to:  $C_{\text{cell}}(i, t) = C_0(i) \cdot e^{-t \cdot k_{\text{out}}(i)}$  using the data from [1]. \* weighted mean =  $\frac{1}{\sum_i R^2(i)} \cdot \sum_i R^2(i) \cdot x(i)$ , where  $x(i)$  is either  $C_0(i)$ ,  $k_{\text{out}}(i)$  or  $t_{1/2}(i)$  and  $R^2(i)$  is the pearson's correlation coefficient between experimental and predicted decay. <sup>b</sup> Halflife computed using  $t_{1/2} = \ln(2)/k_{\text{out}}(i)$ .

## References

1. Hawkins T, Veikley W, Claire RLS, Guyer B, Clark N, et al. (2005) Intracellular pharmacokinetics of tenofovir diphosphate, carbovir triphosphate, and lamivudine triphosphate in patients receiving triple-nucleoside regimens. J Acquir Immune Defic Syndr 39: 406–411.
