# Supplementary material for: Pharmacokinetics and Pharmacodynamics of the Reverse Transcriptase Inhibitor Tenofovir and Prophylactic Efficacy against HIV-1 Infection
Source: PubMed Central journal article supplement (PMC3394807; doi:10.1371/journal.pone.0040382), 2012-07-11
Supplement: pone.0040382.s003.pdf [file pone.0040382.s003.pdf]

**Table S3. Contingency table for infection events during once daily PrEP with 300mg TDF**

| Inoc. size | Adherence               |                         |                         |                         |                         |
|------------|-------------------------|-------------------------|-------------------------|-------------------------|-------------------------|
|            | 20%                     | 40%                     | 60%                     | 80%                     | 100%                    |
| 1          | (1927;73)               | (1954;46)               | (1959;41)               | (1953;47)               | (1952;48)               |
| 5          | (1668;332)              | (1720;280)              | (1755;245)              | (1768;232)              | (1794;206)              |
| 20         | (1046;954)              | (1170;830)              | (1274;726)              | (1287;713)              | (1323;677)              |
| 100        | (154;1846)              | (255;1745)              | (312;1688)              | (346;1654)              | (337;1663)              |
|            | p < 0.01 <sup>+++</sup> | p < 0.01 <sup>+++</sup> | p < 0.01 <sup>+++</sup> | p < 0.01 <sup>+++</sup> | p < 0.01 <sup>+++</sup> |

Predictions are based on 2000 'virtual patients' simulations respectively. The first number in the brackets in columns 2-6 indicates the number of 'virtual patients' that remained uninfected after viral challenge, whereas the second number indicates the number of patients that became infected. For example when 20% of once daily 300mg TDF pills are ingested and patients are challenged with inoculum size one (one virus reaches a target cell environment) 1927 'virtual patients' remained uninfected, whereas 73 became infected. <sup>+++</sup> Inoculum size has a significant impact on the number of infections at the p < 0.01 level ( $\chi^2$ -test).
