# Supplementary material for: Pharmacokinetics and Pharmacodynamics of the Reverse Transcriptase Inhibitor Tenofovir and Prophylactic Efficacy against HIV-1 Infection
Source: PubMed Central journal article supplement (PMC3394807; doi:10.1371/journal.pone.0040382), 2012-07-11
Supplement: pone.0040382.s006.pdf [file pone.0040382.s006.pdf]

**Table S6. Contingency table of infection events for a single oral TDF dose 600mg (sd-PrEP).**

| Inoc. size | Drug intake prior to viral exposure |                         |                         |                         |                         |
|------------|-------------------------------------|-------------------------|-------------------------|-------------------------|-------------------------|
|            | 1 hr                                | 6 hr                    | 12 hr                   | 24 hr                   | 48 hr                   |
| 1          | (1839;161)                          | (1840;160)              | (1857;143)              | (1885;115)              | (1882;118)              |
| 5          | (1379;621)                          | (1351;649)              | (1422;578)              | (1490;510)              | (1510;490)              |
| 20         | (422;1578)                          | (537;1463)              | (595;1405)              | (732;1268)              | (741;1259)              |
| 100        | (8;1992)                            | (28;1972)               | (60;1940)               | (110;1890)              | (116;1884)              |
|            | p < 0.01 <sup>+++</sup>             | p < 0.01 <sup>+++</sup> | p < 0.01 <sup>+++</sup> | p < 0.01 <sup>+++</sup> | p < 0.01 <sup>+++</sup> |

Predictions are based on 2000 'virtual patients' simulations respectively. The first number in the brackets in columns 2-6 indicates the number of 'virtual patients' that remained uninfected after viral challenge, whereas the second number indicates the number of patients that became infected. For example, when 600mg TDF are taken 1hour before viral challenge and patients are challenged with inoculum size one (one virus reaches a target cell environment), 1839 virtual patients remain uninfected, whereas 161 became infected. <sup>+++</sup> Inoculum size has a significant impact on the number of infections at the p < 0.01 level ( $\chi^2$ -test).
