# Supplementary material for: Pharmacokinetics and Pharmacodynamics of the Reverse Transcriptase Inhibitor Tenofovir and Prophylactic Efficacy against HIV-1 Infection
Source: PubMed Central journal article supplement (PMC3394807; doi:10.1371/journal.pone.0040382), 2012-07-11
Supplement: pone.0040382.s007.pdf [file pone.0040382.s007.pdf]

**Table S7. Statistical test of difference of prophylactic efficacy between 300mg sd-PrEP and 600mg sd-PrEP with TDF.**

| Inoc. size | Drug intake prior to viral exposure |          |          |          |          |
|------------|-------------------------------------|----------|----------|----------|----------|
|            | 1 hr                                | 6 hr     | 12 hr    | 24 hr    | 48 hr    |
| 1          | p = 0.26                            | p = 0.19 | p = 0.76 | p = 0.3  | p = 0.6  |
| 5          | p < 0.05                            | p = 0.3  | p = 0.53 | p < 0.05 | p = 0.4  |
| 20         | p = 0.2                             | p = 0.16 | p = 0.47 | p < 0.01 | p = 0.26 |
| 100        | p = 0.2                             | p = 0.18 | p = 0.2  | p < 0.01 | p < 0.05 |

The distinct fields show the p-value for a  $\chi^2$ -test between the prophylactic efficacy between 300mg and 600mg sd-PrEP with TDF. The predicted outcome was significantly different between the two distinct dosing regimens, if the p-value is  $p < 0.05$ , or  $p < 0.01$  respectively (yellow- and red-shaded fields).
